# Supplementary material for: Android design and assessment of a Björk-Jarabak-based application for cephalometric diagnosis in Latin-American people
Source: Research Square preprint supplement (doi:10.21203/rs.3.rs-1646882/v1), 2022-06-08
Supplement: Supplementary file 1 [file 10ec2041b0128c95ba507d62.xlsx]

## Sheet: Hoja1
Autors	Year	Sample size	Methods	Digital tracing software
Tsorovas and Karsten	2010	30	Manual tracing method vs scanned digital image	Viewbox, OnyxCeph, OrisCeph, FACAD and Winceph
Krishnaraj R et al.	2010	10	Manual tracing method vs scanned digital image	Dolphin
Paixão MB et al.	2010	50	Manual tracing method vs scanned digital image	Dolphin
Guedes PA et al.	2010	50	Manual tracing method vs scanned digital image	Cef-X 2001
Cavdar K et al	2011	90	Manual tracing method vs scanned digital image	JOE, Quick Ceph Image Pro
Murali et al	2011	80	Manual tracing method vs scanned digital image	Vistadent
Albarakati et al.	2012	30	Manual tracing method vs scanned digital image	Dolphin
Erkan et al.	2012	30	Manual tracing method vs scanned digital image	Dolphin®, VistadentTM, Nemoceph NX and Quick Ceph
Albarakati et al.	2012	30	Manual tracing method vs scanned digital image	Dolphin
Bonilla M et al.	2013	11	Manual tracing method vs scanned digital image	Cephapoint
Tikku T et al.	2014	40	Manual tracing method vs scanned digital image	Nemoceph NX
Prabhakar R et al.	2014	30	Manual tracing method vs scanned digital image	Dolphin and Nemoceph NX
Kumar D et al.	2014	60	Manual tracing method vs scanned digital image	Nemoceph NX
Segura et al.	2014	20	Manual tracing method vs scanned digital image	Nemoceph NX
Goracci and Ferrari	2014	20	Manual tracing method vs scanned digital image	Smile Ceph and Nemoceph NX
Pellicer	2014	30	Manual tracing method vs scanned digital image	Nemoceph,Ortomed,Dolphin
Esteva F et al.	2014	20	Manual tracing method vs scanned digital image	Nemoceph NX
Agrawal M et al.	2015	25	Manual tracing method vs scanned digital image	CADCAS
Nouri M et al.	2015	150	Scanned digital image	Dolphin, ICC 0.570-1.0
Farooq et al.	2016	50	Manual tracing method vs scanned digital image	FACAD
Hardik et al.	2016	60	Manual tracing method vs scanned digital image	FACAD
Kamath and Arun	2016	20	Manual tracing method vs scanned digital image	FACAD
Borja and Nicole	2016	70	Manual tracing method vs scanned digital image	Dolphin Imaging
Calle	2016	30	Manual tracing method vs scanned digital image	Nemoceph
Aksakalli et al.	2017	20	Scanned digital image	CephNinja, SmartCeph Pro, Dolphin
Sayar and Kilinc	2017	55	Manual tracing method vs scanned digital image	CephNinja app
Sangroula P et al.	2018	60	Manual tracing method vs scanned digital image	Dolphin, AutoCEPH
Arslan C et al.	2018	10	Manual tracing method vs scanned digital image	Dolphin
Maspero C et al.	2019	18	Tridimensional cephalometric analysis: 3T-MRI vs CBCT	3T-MRI, CBCT
Jodeh D et al.	2019	62	Scanned digital image	Dolphin, Mimics 19.0
Kishore S et al.	2019	20	Manual tracing method vs scanned digital image	FACAD
Hassan N et al.	2019	110	Manual tracing method vs scanned digital image	TrophyDicom
