# Supplementary material for: Android design and assessment of a Björk-Jarabak-based application for cephalometric diagnosis in Latin-American people
Source: Research Square preprint supplement (doi:10.21203/rs.3.rs-1646882/v1), 2022-06-08
Supplement: Supplementary file 3 [file 3604a0fbd2c72d5477830b23.xlsx]

## Sheet: Hoja1
Name	Dolphin Imaging	Ortomed	NemoCeph	CEFAX	CefMed	OrisCeph RxCE	UCeph
Beta	1989						2019
geographic location	U.S.A	Spain	Spain	Mexico	Argentina	Madrid-Italy-Portugal	Mexico
Use in Schools	97% U.S.A	not mentioned	not mentioned	not mentioned	not mentioned	not mentioned	the intention
Quality	ISO 13485 (2016)	FDA (USA), canada medical regulation	not mentioned	not mentioned	not mentioned	Decreto Legislativo 231/2001	the intention
Cost	$1,895 USD	Not Available	72,840 MXN -3,471.55USD	12,500 MXN -595.75 USD	USD 6.45 (10 trace)	Special quote	free for schools
Term of the license	12 months	Not Available	not mentioned	Forever	60 days	Different	Forever
Flexibility	Yes (up to 120)	Yes (50 types analysis, customizable)	Yes (customizable)	Yes	Yes	Yes (customizable)	Yes
Industrial Partners	Yes	No	Yes	No	Yes	Yes	the intention
Technical support	Yes	No	Yes	Yes	Yes	Yes	Yes
Free Trial	No	No	Yes (online)	yes (30 days)	Yes (3 traced)	No	Yes
Requirements (web listing)	Yes	Yes	not mentioned	Yes	not mentioned	Yes	Yes
Validation of its latest version	No	No	No	No	No	No	Yes
Online help or technical support	yes(Paid)	No	No	Yes (internet)	Yes (With charge)	Yes	the intention
